# Supplementary material for: Exploring Seaweed and Glycine Betaine Biostimulants for Enhanced Phenolic Content, Antioxidant Properties, and Gene Expression of Vitis vinifera cv. “Touriga Franca” Berries
Source: MDPI journal article supplement (doi:10.3390/ijms25105335), 2024-05-14
Supplement: s1 [file s1]

**Table S1.** Variation in the content of bioactive compounds: total phenolics, flavonoids, *ortho*-diphenols, and total anthocyanins, in berries of cv. ‘Touriga Franca’ under different treatments at veraison and harvest. Values are means  $\pm$  SD. C – Control; ANE – seaweed extract; GB – glycine betaine.

| Bioactive Compounds                                    | Growth Stage/Year | C                | ANE 0.05%        | ANE 0.1%         | GB 0.1%           | GB 0.2%          |
|--------------------------------------------------------|-------------------|------------------|------------------|------------------|-------------------|------------------|
| Total Phenolics<br>(mg GAE g <sup>-1</sup> DW))        | Veraison          | 27.04 $\pm$ 9.63 | 28.57 $\pm$ 5.59 | 27.53 $\pm$ 7.73 | 37.31 $\pm$ 3.52  | 39.82 $\pm$ 9.79 |
|                                                        | Harvest           | 7.52 $\pm$ 1.55  | 15.04 $\pm$ 3.31 | 13.52 $\pm$ 3.29 | 17.41 $\pm$ 10.93 | 8.48 $\pm$ 3.02  |
| Flavonoids<br>(mg CE g <sup>-1</sup> DW)               | Veraison          | 13.04 $\pm$ 0.73 | 9.82 $\pm$ 1.50  | 18.88 $\pm$ 7.16 | 13.48 $\pm$ 2.66  | 24.37 $\pm$ 3.20 |
|                                                        | Harvest           | 4.78 $\pm$ 2.97  | 4.86 $\pm$ 0.92  | 5.69 $\pm$ 1.53  | 6.31 $\pm$ 1.53   | 4.65 $\pm$ 1.33  |
| <i>Ortho</i> -diphenols<br>(mg GAE g <sup>-1</sup> DW) | Veraison          | 13.25 $\pm$ 5.52 | 14.24 $\pm$ 2.85 | 15.96 $\pm$ 2.27 | 18.77 $\pm$ 1.72  | 18.78 $\pm$ 4.45 |
|                                                        | Harvest           | 5.43 $\pm$ 0.64  | 5.67 $\pm$ 1.03  | 6.06 $\pm$ 1.80  | 8.58 $\pm$ 1.56   | 5.88 $\pm$ 2.54  |
| Total anthocyanins<br>(mg GAE g <sup>-1</sup> DW)      | Veraison          | 1.94 $\pm$ 0.66  | 1.96 $\pm$ 0.44  | 1.76 $\pm$ 0.65  | 2.56 $\pm$ 0.85   | 1.11 $\pm$ 0.54  |
|                                                        | Harvest           | 1.99 $\pm$ 0.51  | 3.10 $\pm$ 0.79  | 2.78 $\pm$ 0.51  | 4.16 $\pm$ 0.20   | 2.20 $\pm$ 0.55  |

**Table S2.** Antioxidant activity: ABTS<sup>••</sup> radical-scavenging activity, DPPH radical-scavenging activity and FRAP assay, in berries of cv. ‘Touriga Franca’, under different treatments at veraison and harvest. Values are means  $\pm$  SD. C – Control; ANE – seaweed extract; GB – glycine betaine.

| Antioxidant Activity                | Growth Stage/Year | C                 | ANE 0.05%         | ANE 0.1%          | GB 0.1%           | GB 0.2%            |
|-------------------------------------|-------------------|-------------------|-------------------|-------------------|-------------------|--------------------|
| ABTS <sup>••</sup> (μmol Trolox/μg) | Veraison          | 35.41 $\pm$ 2.62  | 37.69 $\pm$ 1.87  | 33.04 $\pm$ 3.08  | 36.46 $\pm$ 2.90  | 35.80 $\pm$ 3.66   |
|                                     | Harvest           | 41.70 $\pm$ 5.08  | 41.61 $\pm$ 5.51  | 40.65 $\pm$ 6.22  | 39.37 $\pm$ 3.45  | 44.08 $\pm$ 5.79   |
| DPPH (μmol Trolox/μg)               | Veraison          | 54.71 $\pm$ 9.30  | 43.53 $\pm$ 3.12  | 51.29 $\pm$ 8.68  | 51.61 $\pm$ 8.81  | 57.52 $\pm$ 3.41   |
|                                     | Harvest           | 21.86 $\pm$ 3.05  | 24.07 $\pm$ 3.87  | 22.66 $\pm$ 8.22  | 27.39 $\pm$ 4.50  | 21.58 $\pm$ 6.80   |
| FRAP (μmol Trolox/μg)               | Veraison          | 60.26 $\pm$ 25.03 | 55.11 $\pm$ 11.27 | 76.40 $\pm$ 22.05 | 85.38 $\pm$ 32.66 | 105.41 $\pm$ 28.86 |
|                                     | Harvest           | 43.30 $\pm$ 6.53  | 43.67 $\pm$ 10.71 | 43.67 $\pm$ 12.84 | 56.40 $\pm$ 11.41 | 36.40 $\pm$ 10.03  |

**Table S3.** Relative gene expression in berries of cv. 'Touriga Franca', under different treatments at veraison and harvest. Values are means  $\pm$  SD. C – Control; ANE– seaweed extract; GB – glycine betaine; T – Treatment; PS – Phenological Stage; PAL – Phenylalanine ammonia-lyase; CHS - Chalcone synthase; F3H – Flavanone 3-hydroxylase; MATE1 - Tonoplast transporter; UFGT – UDP glucose: flavonoid 3-O-glucosyltransferase; ABCC1 – Anthocyanin transporter; ANR – Anthocyanidin reductase; GST – Glutathione S-transferase

| Gene  | Growth Stage/Year | C               | ANE 0.05%         | ANE 0.1%         | GB 0.1%          | GB 0.2%         |
|-------|-------------------|-----------------|-------------------|------------------|------------------|-----------------|
| PAL   | Veraison          | 1.00 $\pm$ 0.02 | 0.81 $\pm$ 0.30   | 0.29 $\pm$ 0.09  | 0.73 $\pm$ 0.39  | 1.29 $\pm$ 0.18 |
|       | Harvest           | 1.01 $\pm$ 0.20 | 0.04 $\pm$ 0.03   | 0.03 $\pm$ 0.01  | 0.01 $\pm$ 0.01  | 0.00 $\pm$ 0.00 |
| CHS   | Veraison          | 1.00 $\pm$ 0.10 | 9.48 $\pm$ 2.35   | 8.83 $\pm$ 2.49  | 18.79 $\pm$ 6.01 | 5.29 $\pm$ 0.32 |
|       | Harvest           | 1.03 $\pm$ 0.29 | 1.11 $\pm$ 0.22   | 0.18 $\pm$ 0.02  | 0.01 $\pm$ 0.01  | 0.12 $\pm$ 0.00 |
| F3H   | Veraison          | 1.00 $\pm$ 0.01 | 14.39 $\pm$ 7.08  | 5.87 $\pm$ 1.62  | 17.93 $\pm$ 5.93 | 1.75 $\pm$ 0.06 |
|       | Harvest           | 1.09 $\pm$ 0.57 | 0.26 $\pm$ 0.27   | 0.88 $\pm$ 0.76  | 0.76 $\pm$ 0.70  | 0.22 $\pm$ 0.01 |
| MATE1 | Veraison          | 1.12 $\pm$ 0.55 | 5.74 $\pm$ 0.78   | 0.58 $\pm$ 0.19  | 0.54 $\pm$ 0.63  | 0.40 $\pm$ 0.05 |
|       | Harvest           | 1.02 $\pm$ 0.27 | 0.58 $\pm$ 0.29   | 0.24 $\pm$ 0.11  | 1.07 $\pm$ 1.21  | 0.35 $\pm$ 0.04 |
| UFGT  | Veraison          | 1.01 $\pm$ 0.19 | 2.40 $\pm$ 0.61   | 2.98 $\pm$ 2.20  | 5.24 $\pm$ 1.47  | 1.58 $\pm$ 0.42 |
|       | Harvest           | 1.05 $\pm$ 0.37 | 0.30 $\pm$ 0.10   | 2.19 $\pm$ 1.52  | 0.05 $\pm$ 0.02  | 0.02 $\pm$ 0.02 |
| ABCC1 | Veraison          | 1.00 $\pm$ 0.02 | 1.17 $\pm$ 0.58   | 1.66 $\pm$ 0.48  | 1.21 $\pm$ 0.68  | 1.35 $\pm$ 0.37 |
|       | Harvest           | 1.01 $\pm$ 0.19 | 3.46 $\pm$ 1.37   | 0.91 $\pm$ 0.48  | 0.79 $\pm$ 0.37  | 0.35 $\pm$ 0.08 |
| ANR   | Veraison          | 1.10 $\pm$ 0.57 | 4.35 $\pm$ 2.08   | 0.90 $\pm$ 0.43  | 0.35 $\pm$ 0.20  | 1.80 $\pm$ 0.29 |
|       | Harvest           | 1.32 $\pm$ 0.13 | 0.11 $\pm$ 0.17   | 0.02 $\pm$ 0.01  | 0.00 $\pm$ 0.00  | 0.00 $\pm$ 0.00 |
| GST   | Veraison          | 1.12 $\pm$ 0.35 | 16.52 $\pm$ 20.03 | 44.52 $\pm$ 1.58 | 33.03 $\pm$ 8.02 | 7.70 $\pm$ 2.79 |
|       | Harvest           | 1.15 $\pm$ 0.72 | 1.40 $\pm$ 0.41   | 1.65 $\pm$ 1.58  | 6.73 $\pm$ 9.31  | 4.08 $\pm$ 0.42 |

**Table S4.** Applications of five foliar treatments, phenological stages, date and dosages. C – Control; ANE – seaweed extract; GB – glycine betaine.

| Phenological Stage     | Date                        | Treatment                        | Total of vines |
|------------------------|-----------------------------|----------------------------------|----------------|
| Flowering (BBCH 65)    | May 21 <sup>th</sup> 2020   | ANE 0.05% (2.5mL ANE + 5L water) | 30             |
|                        |                             | ANE 0.1% (5mL ANE + 5L water)    | 30             |
|                        |                             | GB 0.1% (5g GB + 5L water)       | 30             |
|                        |                             | GB 0.2% (10g GB + 5L water)      | 30             |
|                        |                             | Control (5L water)               | 30             |
| Pea size (BBCH 75)     | June 4 <sup>th</sup> 2020   | ANE 0.05% (2.5mL ANE + 5L water) | 30             |
|                        |                             | ANE 0.1% (5mL ANE + 5L water)    | 30             |
|                        |                             | GB 0.1% (5g GB + 5L water)       | 30             |
|                        |                             | GB 0.2% (10g GB + 5L water)      | 30             |
|                        |                             | Control (5L water)               | 30             |
| Bunch closer (BBCH 77) | June 16 <sup>th</sup> 2020  | ANE 0.05% (2.5mL ANE + 5L water) | 30             |
|                        |                             | ANE 0.1% (5mL ANE + 5L water)    | 30             |
|                        |                             | GB 0.1% (5g GB + 5L water)       | 30             |
|                        |                             | GB 0.2% (10g GB + 5L water)      | 30             |
|                        |                             | Control (5L water)               | 30             |
| Veraison (BBCH 81)     | July 10 <sup>th</sup> 2020t | ANE 0.05% (2.5mL ANE + 5L water) | 30             |
|                        |                             | ANE 0.1% (5mL ANE + 5L water)    | 30             |
|                        |                             | GB 0.1% (5g GB + 5L water)       | 30             |
|                        |                             | GB 0.2% (10g GB + 5L water)      | 30             |
|                        |                             | Control (5L water)               | 30             |

**Table S5.** Primer sequences , and annealing temperatures for the genes analyzed.

| Gene  |                                                        | Primer sequence                       | Annealing temperature | Reference |
|-------|--------------------------------------------------------|---------------------------------------|-----------------------|-----------|
| PAL   | <i>Phenylalanine ammonia-lyase</i>                     | F 5' CCTACTGTTCCAGAGCTCCAG 3'         | 57 °C                 | [22]      |
|       |                                                        | R 5' GCCACTAGGTATGTGGTAGACA 3'        |                       |           |
| CHS   | <i>Chalcone synthase</i>                               | F 5' CACTCTTCGAACTCGTCTCT 3'          | 57 °C                 | [22]      |
|       |                                                        | R 5' CCACCAAGCTCTTCTCTATG 3'          |                       |           |
| F3H   | <i>Flavanone3-hydroxylase</i>                          | F 5' CAGTGCAAGACTGGCGCGAGATCGTA 3'    | 57 °C                 | [22]      |
|       |                                                        | R 5' TAGCCTCAGACAACACCTCCAGCAACT 3'   |                       |           |
| ANR   | <i>Anthocyanidin reductase</i>                         | F 5' CTGTCAGGTTTCAGTCTCCAT 3'         | 57 °C                 | [22]      |
|       |                                                        | R 5' GTTGGGACTTTGTACTGAGG 3'          |                       |           |
| UFGT  | <i>UDP glucose: flavonoid 3-O-glucosyl transferase</i> | F 5' TGCAGGGCCTAACTCACTCT 3'          | 57 °C                 | [22]      |
|       |                                                        | R 5' GCAGTCGCCTTAGGTAGCAC 3'          |                       |           |
| ABCC1 | <i>Anthocyanin transporter</i>                         | F 5' CTCCACTGGTCCTCTGCTTC 3'          | 57 °C                 | [22]      |
|       |                                                        | R 5' AGCCTGCTTCGAAAGTACCA 3'          |                       |           |
| MATE1 | <i>Tonoplast transporter</i>                           | F 5' TGCTTTTGTGATTTTGTTAGAGG 3'       | 57 °C                 | [22]      |
|       |                                                        | R 5' CCCTCCCCGATTGAGAGTA 3'           |                       |           |
| GST   | <i>GlutathioneS-transferase</i>                        | F 5' AAGGATCCATGGTGATGAAGGTGTATGGC 3' | 57 °C                 | [22]      |
|       |                                                        | R 5' AACTGCAGAAGCCAACCAACCAACAAAC 3'  |                       |           |
| UBI   | <i>Ubiquitin</i>                                       | F 5' TCTGAGGCTTCGTGGTGTA 3'           | 57 °C                 | [56]      |
|       |                                                        | R 5' AGGCGTGCATAACATTTGCG 3'          |                       |           |

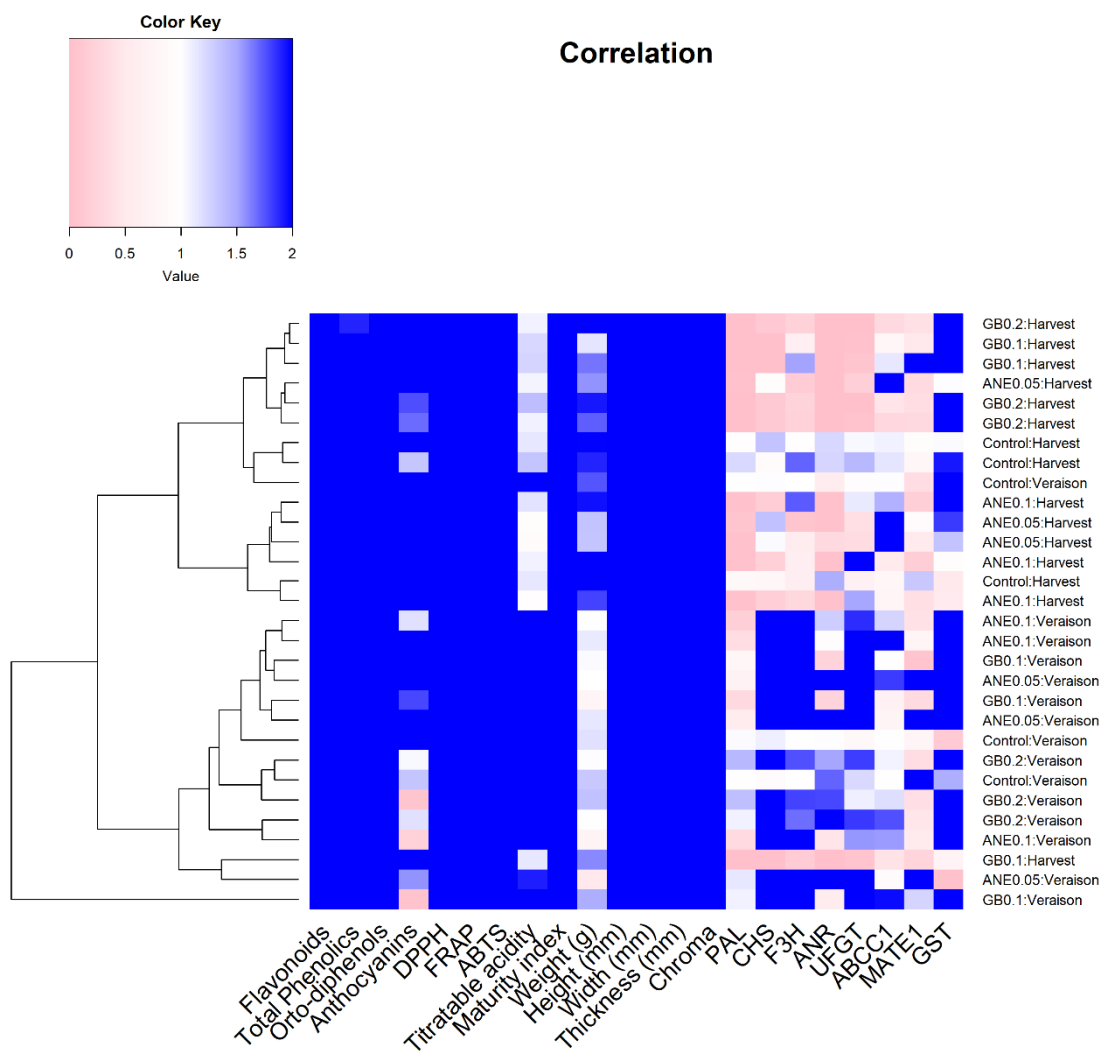

**Figure S1.** Heatmap of correlations between analyzed parameters at veraison and harvest in the tested different treatments. ANE– seaweed extract; GB – glycine betaine.
